# Supplementary material for: Phase transition of hollow-porous α-Fe2O3 microsphere based anodes for lithium ion batteries during high rate cycling
Source: Royal Society of Chemistry journal article supplement (doi:10.1039/c6ta07131g), 2016-01-01
Supplement: c6ta07131g1.pdf [file c6ta07131g1.pdf]

## Electronic Supplementary Information: Phase transition of hollow-porous $\alpha$ - $\text{Fe}_2\text{O}_3$ microspheres based anodes for lithium ion batteries during high rate cycling

Shiji Hao <sup>a</sup>, Bowei Zhang <sup>b</sup>, Sarah Ball <sup>c\*</sup>, Junsheng Wu <sup>d\*</sup>, Madhavi Srinivasan <sup>a, b</sup> and Yizhong Huang <sup>a, b,\*</sup>

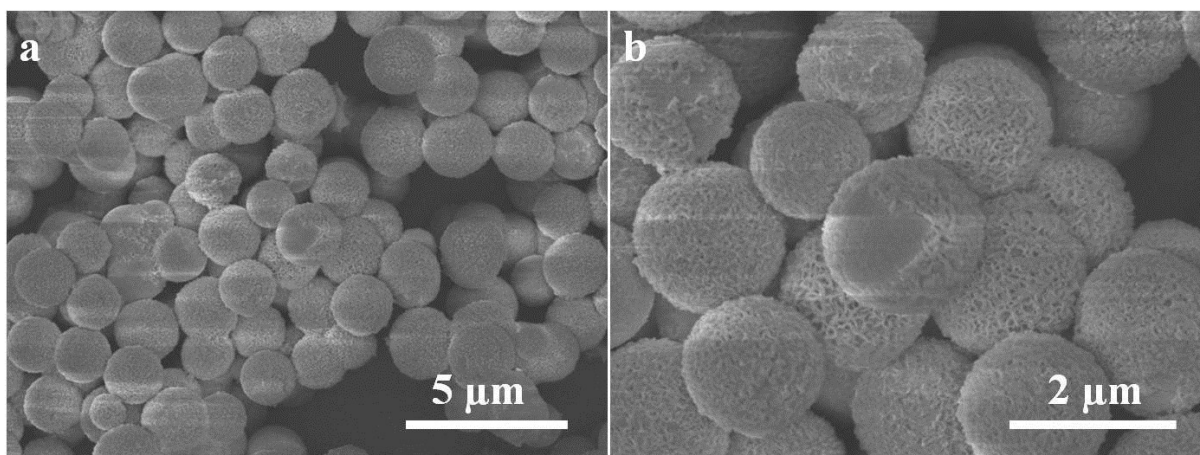

Fig. S1 SEM images of the zinc citrate microspheres template.

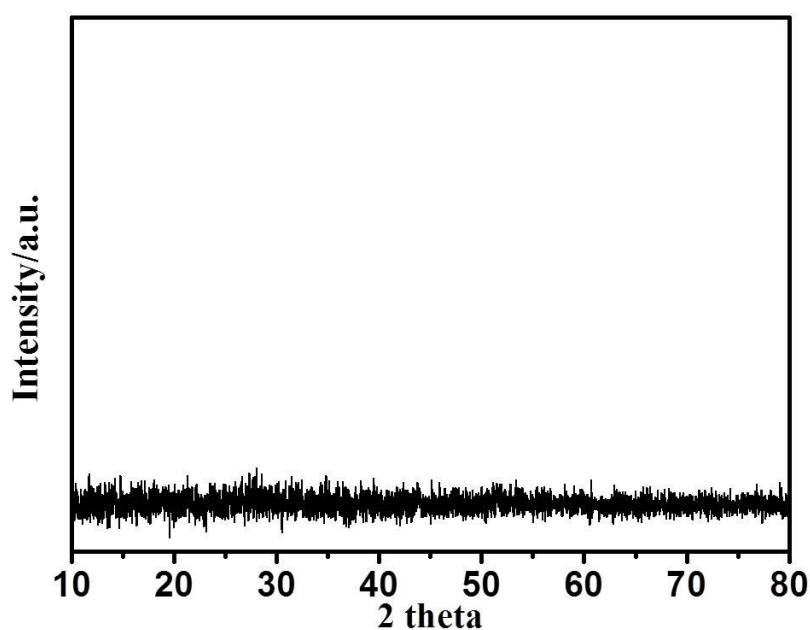

Fig. S2 XRD pattern of the precursor.
